# Supplementary material for: Enhanced Mechanical Properties and Microstructure of Accumulative Roll-Bonded Co/Pb Nanocomposite
Source: MDPI journal article supplement (doi:10.3390/nano11051190), 2021-04-30
Supplement: s1 [file s1]

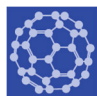

## Supporting Information

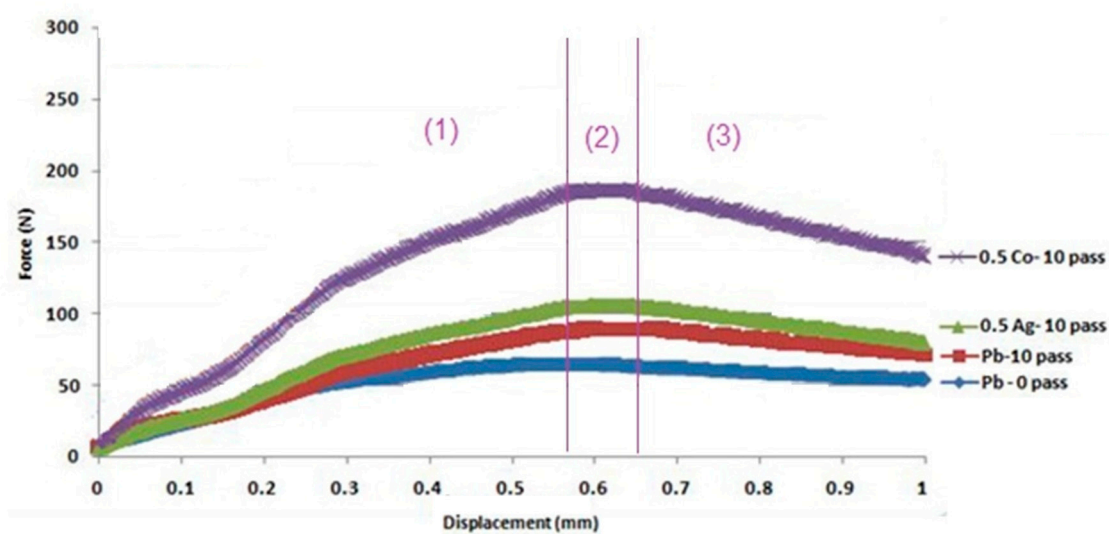

**Figure S1.** Shear punch curves test for Pb-Ag, Pb-Co and Pb at 10 passes of ARB.

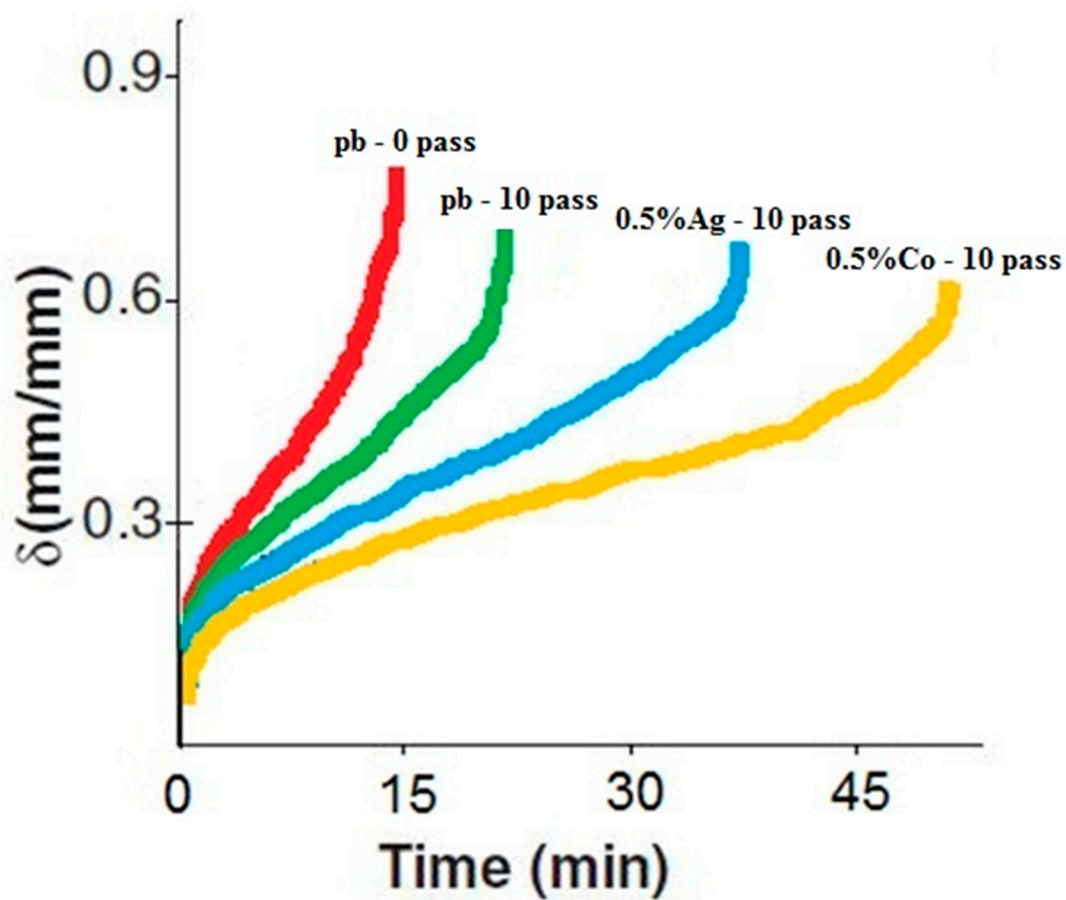

Figure S2. Shear punch test of different samples.

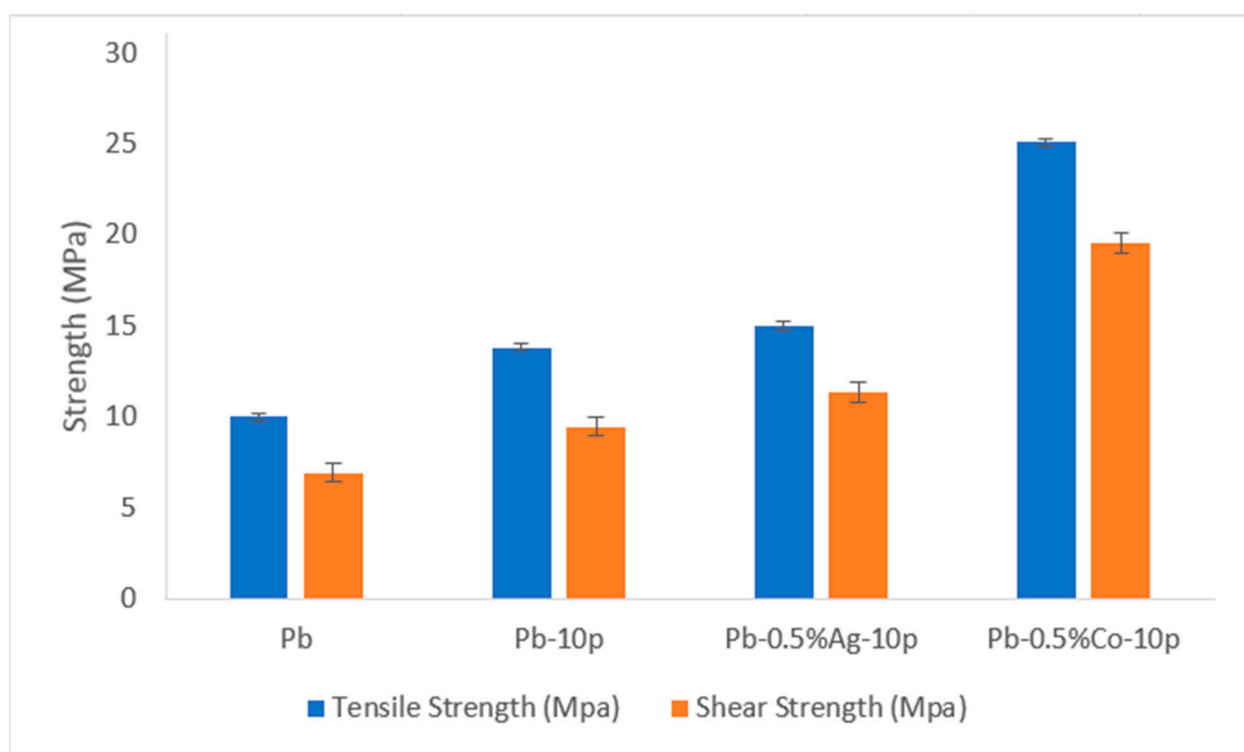

**Figure S3.** Tensile strengths and shear strengths of different specimens.
